# Supplementary material for: The Time Value of Carbon Storage
Source: Research Square preprint supplement (doi:10.21203/rs.3.rs-966946/v1), 2021-10-13
Supplement: Supplementary file 2 [file cf614da4396dfc82d2c09172.xlsx]

## Sheet: 100 Time Horizon
	Discount Rate	0.033			30.0813		30.8058
	Instant release			Delay one year
	ton years (after 100 years)	53.0661		100d1 value	0.621301
	discounted (after 100 years)	18.6896		delayed and discounted (after 100 years)	18.0682
	discounted (after 1000 years)	19.1165		delayed and discounted (after 1000 years)	18.496		0.62055
				1000d1 value	0.62055
	Scenario 1	Scenario 2		Scenario 3	Scenario 4
Year	Carbon	Discounted Carbon		Carbon	Discounted Carbon
0	1	1		0	0
1	0.934525	0.904189		1	0.967539
2	0.881134	0.824857		0.934525	0.874838
3	0.837359	0.758431		0.881134	0.798081
4	0.801242	0.702161		0.837359	0.733812
5	0.771231	0.653922		0.801242	0.679368
6	0.746095	0.612074		0.771231	0.632695
7	0.724857	0.575348		0.746095	0.592205
8	0.706741	0.542758		0.724857	0.556671
9	0.691132	0.513541		0.706741	0.52514
10	0.67754	0.4871		0.691132	0.496871
11	0.665578	0.462967		0.67754	0.471288
12	0.654938	0.440778		0.665578	0.447939
13	0.645373	0.420241		0.654938	0.426469
14	0.636688	0.401128		0.645373	0.406599
15	0.628729	0.383255		0.636688	0.388107
16	0.62137	0.366474		0.628729	0.370814
17	0.614513	0.350665		0.62137	0.354577
18	0.608079	0.335729		0.614513	0.339282
19	0.602004	0.321586		0.608079	0.324831
20	0.596238	0.308166		0.602004	0.311147
21	0.590739	0.295413		0.596238	0.298163
22	0.585475	0.283276		0.590739	0.285824
23	0.580418	0.271713		0.585475	0.274081
24	0.575546	0.260687		0.580418	0.262893
25	0.570843	0.250163		0.575546	0.252225
26	0.566292	0.240113		0.570843	0.242043
27	0.561883	0.23051		0.566292	0.232319
28	0.557604	0.221329		0.561883	0.223027
29	0.553447	0.212547		0.557604	0.214144
30	0.549404	0.204146		0.553447	0.205648
31	0.54547	0.196105		0.549404	0.197519
32	0.54164	0.188406		0.54547	0.189739
33	0.537907	0.181034		0.54164	0.18229
34	0.534269	0.173973		0.537907	0.175158
35	0.530721	0.167208		0.534269	0.168325
36	0.527259	0.160725		0.530721	0.16178
37	0.523882	0.154511		0.527259	0.155507
38	0.520585	0.148555		0.523882	0.149496
39	0.517367	0.142844		0.520585	0.143732
40	0.514225	0.137368		0.517367	0.138207
41	0.511156	0.132115		0.514225	0.132908
42	0.508158	0.127077		0.511156	0.127827
43	0.505229	0.122243		0.508158	0.122952
44	0.502368	0.117605		0.505229	0.118275
45	0.499572	0.113154		0.502368	0.113787
46	0.496839	0.108882		0.499572	0.109481
47	0.494168	0.104781		0.496839	0.105348
48	0.491557	0.100844		0.494168	0.10138
49	0.489004	0.0970641		0.491557	0.0975708
50	0.486509	0.0934339		0.489004	0.0939133
51	0.484068	0.0899474		0.486509	0.0904009
52	0.481681	0.0865985		0.484068	0.0870276
53	0.479347	0.0833813		0.481681	0.0837874
54	0.477063	0.0802903		0.479347	0.0806746
55	0.474829	0.0773201		0.477063	0.0776839
56	0.472643	0.0744658		0.474829	0.0748102
57	0.470504	0.0717225		0.472643	0.0720486
58	0.468411	0.0690856		0.470504	0.0693943
59	0.466362	0.0665506		0.468411	0.066843
60	0.464357	0.0641134		0.466362	0.0643903
61	0.462394	0.06177		0.464357	0.0620322
62	0.460472	0.0595164		0.462394	0.0597648
63	0.45859	0.0573491		0.460472	0.0575844
64	0.456747	0.0552645		0.45859	0.0554874
65	0.454942	0.0532592		0.456747	0.0534705
66	0.453174	0.05133		0.454942	0.0515303
67	0.451442	0.0494739		0.453174	0.0496638
68	0.449744	0.047688		0.451442	0.0478679
69	0.448081	0.0459694		0.449744	0.04614
70	0.446452	0.0443153		0.448081	0.0444771
71	0.444854	0.0427234		0.446452	0.0428768
72	0.443288	0.041191		0.444854	0.0413365
73	0.441753	0.0397159		0.443288	0.0398539
74	0.440247	0.0382957		0.441753	0.0384266
75	0.438771	0.0369283		0.440247	0.0370525
76	0.437323	0.0356116		0.438771	0.0357295
77	0.435903	0.0343437		0.437323	0.0344556
78	0.434509	0.0331227		0.435903	0.0332289
79	0.433142	0.0319466		0.434509	0.0320474
80	0.4318	0.0308138		0.433142	0.0309096
81	0.430484	0.0297226		0.4318	0.0298136
82	0.429191	0.0286715		0.430484	0.0287578
83	0.427922	0.0276587		0.429191	0.0277407
84	0.426676	0.026683		0.427922	0.0267609
85	0.425452	0.0257427		0.426676	0.0258168
86	0.42425	0.0248367		0.425452	0.0249071
87	0.42307	0.0239636		0.42425	0.0240305
88	0.42191	0.0231222		0.42307	0.0231857
89	0.42077	0.0223112		0.42191	0.0223716
90	0.41965	0.0215295		0.42077	0.0215869
91	0.41855	0.0207759		0.41965	0.0208306
92	0.417467	0.0200495		0.41855	0.0201015
93	0.416403	0.0193493		0.417467	0.0193987
94	0.415357	0.0186741		0.416403	0.0187212
95	0.414328	0.0180232		0.415357	0.0180679
96	0.413316	0.0173955		0.414328	0.0174381
97	0.41232	0.0167903		0.413316	0.0168308
98	0.411341	0.0162067		0.41232	0.0162453
99	0.410377	0.0156438		0.411341	0.0156806
100	0.409428	0.015101		0.410377	0.015136
101	0.408494	0.0145775		0.409428	0.0146108
102	0.407574	0.0140725		0.408494	0.0141043
103	0.406668	0.0135854		0.407574	0.0136157
104	0.405777	0.0131156		0.406668	0.0131444
105	0.404898	0.0126624		0.405777	0.0126899
106	0.404033	0.0122252		0.404898	0.0122513
107	0.40318	0.0118034		0.404033	0.0118283
108	0.40234	0.0113964		0.40318	0.0114202
109	0.401512	0.0110038		0.40234	0.0110265
110	0.400696	0.0106249		0.401512	0.0106466
111	0.399891	0.0102594		0.400696	0.01028
112	0.399097	0.00990664		0.399891	0.00992633
113	0.398314	0.00956626		0.399097	0.00958505
114	0.397543	0.00923778		0.398314	0.00925572
115	0.396781	0.00892079		0.397543	0.00893791
116	0.39603	0.00861486		0.396781	0.00863121
117	0.395288	0.00831961		0.39603	0.00833521
118	0.394556	0.00803464		0.395288	0.00804954
119	0.393834	0.00775959		0.394556	0.00777382
120	0.393121	0.00749411		0.393834	0.0075077
121	0.392417	0.00723785		0.393121	0.00725084
122	0.391721	0.00699049		0.392417	0.0070029
123	0.391035	0.00675171		0.391721	0.00676357
124	0.390356	0.00652121		0.391035	0.00653254
125	0.389686	0.00629869		0.390356	0.00630952
126	0.389024	0.00608386		0.389686	0.00609422
127	0.388369	0.00587647		0.389024	0.00588637
128	0.387722	0.00567624		0.388369	0.00568571
129	0.387083	0.00548292		0.387722	0.00549198
130	0.38645	0.00529627		0.387083	0.00530494
131	0.385825	0.00511606		0.38645	0.00512435
132	0.385207	0.00494205		0.385825	0.00494998
133	0.384595	0.00477403		0.385207	0.00478162
134	0.38399	0.00461179		0.384595	0.00461906
135	0.383391	0.00445513		0.38399	0.00446209
136	0.382799	0.00430385		0.383391	0.00431051
137	0.382213	0.00415777		0.382799	0.00416414
138	0.381633	0.00401669		0.382213	0.0040228
139	0.381058	0.00388046		0.381633	0.0038863
140	0.38049	0.00374889		0.381058	0.00375449
141	0.379927	0.00362183		0.38049	0.00362719
142	0.379369	0.00349911		0.379927	0.00350426
143	0.378817	0.0033806		0.379369	0.00338553
144	0.37827	0.00326614		0.378817	0.00327086
145	0.377728	0.00315559		0.37827	0.00316011
146	0.377191	0.00304881		0.377728	0.00305315
147	0.376659	0.00294568		0.377191	0.00294984
148	0.376132	0.00284607		0.376659	0.00285006
149	0.37561	0.00274986		0.376132	0.00275369
150	0.375092	0.00265693		0.37561	0.0026606
151	0.374578	0.00256716		0.375092	0.00257068
152	0.374069	0.00248045		0.374578	0.00248383
153	0.373564	0.00239669		0.374069	0.00239993
154	0.373064	0.00231579		0.373564	0.00231889
155	0.372567	0.00223763		0.373064	0.00224061
156	0.372074	0.00216213		0.372567	0.00216499
157	0.371586	0.0020892		0.372074	0.00209194
158	0.371101	0.00201874		0.371586	0.00202138
159	0.37062	0.00195068		0.371101	0.00195321
160	0.370143	0.00188493		0.37062	0.00188736
161	0.369669	0.00182141		0.370143	0.00182374
162	0.369199	0.00176004		0.369669	0.00176228
163	0.368732	0.00170075		0.369199	0.00170291
164	0.368269	0.00164348		0.368732	0.00164554
165	0.367809	0.00158814		0.368269	0.00159013
166	0.367352	0.00153468		0.367809	0.00153659
167	0.366899	0.00148303		0.367352	0.00148486
168	0.366449	0.00143313		0.366899	0.00143489
169	0.366001	0.00138491		0.366449	0.0013866
170	0.365557	0.00133833		0.366001	0.00133996
171	0.365116	0.00129332		0.365557	0.00129489
172	0.364677	0.00124984		0.365116	0.00125134
173	0.364242	0.00120782		0.364677	0.00120926
174	0.363809	0.00116722		0.364242	0.00116861
175	0.363379	0.001128		0.363809	0.00112933
176	0.362951	0.0010901		0.363379	0.00109138
177	0.362527	0.00105348		0.362951	0.00105471
178	0.362104	0.00101809		0.362527	0.00101928
179	0.361685	0.000983904		0.362104	0.000985046
180	0.361268	0.000950867		0.361685	0.000951965
181	0.360853	0.000918945		0.361268	0.000920001
182	0.360441	0.000888099		0.360853	0.000889115
183	0.360031	0.000858293		0.360441	0.00085927
184	0.359623	0.000829491		0.360031	0.000830431
185	0.359218	0.00080166		0.359623	0.000802564
186	0.358815	0.000774767		0.359218	0.000775637
187	0.358414	0.000748779		0.358815	0.000749616
188	0.358015	0.000723667		0.358414	0.000724473
189	0.357619	0.0006994		0.358015	0.000700175
190	0.357224	0.00067595		0.357619	0.000676696
191	0.356832	0.000653289		0.357224	0.000654007
192	0.356441	0.000631391		0.356832	0.000632082
193	0.356053	0.000610229		0.356441	0.000610895
194	0.355666	0.000589779		0.356053	0.00059042
195	0.355282	0.000570017		0.355666	0.000570634
196	0.354899	0.00055092		0.355282	0.000551514
197	0.354518	0.000532464		0.354899	0.000533036
198	0.354139	0.000514629		0.354518	0.000515179
199	0.353762	0.000497393		0.354139	0.000497923
200	0.353387	0.000480736		0.353762	0.000481247
201	0.353013	0.000464639		0.353387	0.000465131
202	0.352641	0.000449083		0.353013	0.000449556
203	0.352271	0.000434049		0.352641	0.000434505
204	0.351903	0.00041952		0.352271	0.000419959
205	0.351536	0.000405478		0.351903	0.000405901
206	0.351171	0.000391908		0.351536	0.000392316
207	0.350807	0.000378794		0.351171	0.000379186
208	0.350445	0.000366119		0.350807	0.000366498
209	0.350085	0.00035387		0.350445	0.000354235
210	0.349726	0.000342032		0.350085	0.000342383
211	0.349368	0.000330591		0.349726	0.000330929
212	0.349012	0.000319534		0.349368	0.00031986
213	0.348658	0.000308847		0.349012	0.000309161
214	0.348305	0.000298519		0.348658	0.000298822
215	0.347954	0.000288537		0.348305	0.000288829
216	0.347603	0.00027889		0.347954	0.000279171
217	0.347255	0.000269566		0.347603	0.000269837
218	0.346908	0.000260555		0.347255	0.000260816
219	0.346562	0.000251846		0.346908	0.000252097
220	0.346217	0.000243428		0.346562	0.00024367
221	0.345874	0.000235292		0.346217	0.000235526
222	0.345532	0.000227429		0.345874	0.000227655
223	0.345191	0.00021983		0.345532	0.000220047
224	0.344852	0.000212485		0.345191	0.000212694
225	0.344514	0.000205386		0.344852	0.000205587
226	0.344177	0.000198524		0.344514	0.000198719
227	0.343842	0.000191893		0.344177	0.00019208
228	0.343507	0.000185483		0.343842	0.000185664
229	0.343174	0.000179288		0.343507	0.000179462
230	0.342842	0.0001733		0.343174	0.000173468
231	0.342512	0.000167513		0.342842	0.000167675
232	0.342182	0.000161919		0.342512	0.000162075
233	0.341854	0.000156513		0.342182	0.000156663
234	0.341527	0.000151287		0.341854	0.000151432
235	0.341201	0.000146237		0.341527	0.000146376
236	0.340876	0.000141355		0.341201	0.00014149
237	0.340552	0.000136636		0.340876	0.000136766
238	0.34023	0.000132076		0.340552	0.000132201
239	0.339908	0.000127668		0.34023	0.000127788
240	0.339588	0.000123407		0.339908	0.000123523
241	0.339268	0.000119289		0.339588	0.000119401
242	0.33895	0.000115308		0.339268	0.000115416
243	0.338633	0.000111461		0.33895	0.000111565
244	0.338316	0.000107742		0.338633	0.000107842
245	0.338001	0.000104147		0.338316	0.000104244
246	0.337687	0.000100673		0.338001	0.000100766
247	0.337374	9.73145e-05		0.337687	9.74048e-05
248	0.337062	9.40684e-05		0.337374	9.41555e-05
249	0.336751	9.09308e-05		0.337062	9.10148e-05
250	0.336441	8.78981e-05		0.336751	8.79791e-05
251	0.336132	8.49666e-05		0.336441	8.50448e-05
252	0.335824	8.21331e-05		0.336132	8.22085e-05
253	0.335517	7.93943e-05		0.335824	7.9467e-05
254	0.33521	7.6747e-05		0.335517	7.68171e-05
255	0.334905	7.4188e-05		0.33521	7.42556e-05
256	0.334601	7.17146e-05		0.334905	7.17798e-05
257	0.334298	6.93237e-05		0.334601	6.93866e-05
258	0.333995	6.70127e-05		0.334298	6.70734e-05
259	0.333694	6.47789e-05		0.333995	6.48374e-05
260	0.333393	6.26196e-05		0.333694	6.26761e-05
261	0.333094	6.05324e-05		0.333393	6.05869e-05
262	0.332795	5.8515e-05		0.333094	5.85675e-05
263	0.332497	5.65648e-05		0.332795	5.66155e-05
264	0.3322	5.46798e-05		0.332497	5.47286e-05
265	0.331904	5.28577e-05		0.3322	5.29048e-05
266	0.331609	5.10963e-05		0.331904	5.11418e-05
267	0.331315	4.93938e-05		0.331609	4.94377e-05
268	0.331022	4.77481e-05		0.331315	4.77904e-05
269	0.330729	4.61573e-05		0.331022	4.61981e-05
270	0.330438	4.46196e-05		0.330729	4.4659e-05
271	0.330147	4.31332e-05		0.330438	4.31712e-05
272	0.329857	4.16964e-05		0.330147	4.1733e-05
273	0.329568	4.03075e-05		0.329857	4.03429e-05
274	0.32928	3.8965e-05		0.329568	3.89991e-05
275	0.328992	3.76672e-05		0.32928	3.77001e-05
276	0.328706	3.64127e-05		0.328992	3.64445e-05
277	0.32842	3.52001e-05		0.328706	3.52307e-05
278	0.328135	3.40279e-05		0.32842	3.40574e-05
279	0.327851	3.28948e-05		0.328135	3.29233e-05
280	0.327568	3.17995e-05		0.327851	3.1827e-05
281	0.327285	3.07407e-05		0.327568	3.07672e-05
282	0.327004	2.97172e-05		0.327285	2.97428e-05
283	0.326723	2.87279e-05		0.327004	2.87525e-05
284	0.326443	2.77715e-05		0.326723	2.77953e-05
285	0.326163	2.6847e-05		0.326443	2.687e-05
286	0.325885	2.59533e-05		0.326163	2.59755e-05
287	0.325607	2.50894e-05		0.325885	2.51108e-05
288	0.32533	2.42543e-05		0.325607	2.4275e-05
289	0.325054	2.34471e-05		0.32533	2.3467e-05
290	0.324779	2.26667e-05		0.325054	2.2686e-05
291	0.324504	2.19124e-05		0.324779	2.1931e-05
292	0.32423	2.11832e-05		0.324504	2.12011e-05
293	0.323957	2.04783e-05		0.32423	2.04956e-05
294	0.323685	1.97969e-05		0.323957	1.98135e-05
295	0.323413	1.91382e-05		0.323685	1.91543e-05
296	0.323142	1.85014e-05		0.323413	1.85169e-05
297	0.322872	1.78859e-05		0.323142	1.79008e-05
298	0.322603	1.72908e-05		0.322872	1.73053e-05
299	0.322334	1.67156e-05		0.322603	1.67295e-05
300	0.322066	1.61596e-05		0.322334	1.6173e-05
301	0.321799	1.5622e-05		0.322066	1.5635e-05
302	0.321532	1.51024e-05		0.321799	1.51149e-05
303	0.321267	1.46001e-05		0.321532	1.46122e-05
304	0.321002	1.41145e-05		0.321267	1.41261e-05
305	0.320737	1.36451e-05		0.321002	1.36563e-05
306	0.320474	1.31913e-05		0.320737	1.32021e-05
307	0.320211	1.27526e-05		0.320474	1.27631e-05
308	0.319949	1.23285e-05		0.320211	1.23386e-05
309	0.319687	1.19186e-05		0.319949	1.19283e-05
310	0.319427	1.15223e-05		0.319687	1.15317e-05
311	0.319167	1.11392e-05		0.319427	1.11483e-05
312	0.318907	1.07688e-05		0.319167	1.07776e-05
313	0.318649	1.04108e-05		0.318907	1.04193e-05
314	0.318391	1.00647e-05		0.318649	1.00729e-05
315	0.318133	9.73012e-06		0.318391	9.73799e-06
316	0.317877	9.40667e-06		0.318133	9.41426e-06
317	0.317621	9.09399e-06		0.317877	9.10132e-06
318	0.317366	8.79172e-06		0.317621	8.79879e-06
319	0.317111	8.4995e-06		0.317366	8.50633e-06
320	0.316857	8.21701e-06		0.317111	8.2236e-06
321	0.316604	7.94392e-06		0.316857	7.95028e-06
322	0.316352	7.67992e-06		0.316604	7.68605e-06
323	0.3161	7.42471e-06		0.316352	7.43062e-06
324	0.315849	7.17798e-06		0.3161	7.18369e-06
325	0.315598	6.93946e-06		0.315849	6.94497e-06
326	0.315348	6.70888e-06		0.315598	6.7142e-06
327	0.315099	6.48597e-06		0.315348	6.4911e-06
328	0.31485	6.27048e-06		0.315099	6.27543e-06
329	0.314602	6.06215e-06		0.31485	6.06693e-06
330	0.314355	5.86076e-06		0.314602	5.86537e-06
331	0.314109	5.66606e-06		0.314355	5.67051e-06
332	0.313863	5.47784e-06		0.314109	5.48213e-06
333	0.313617	5.29588e-06		0.313863	5.30002e-06
334	0.313373	5.11997e-06		0.313617	5.12397e-06
335	0.313129	4.94991e-06		0.313373	4.95377e-06
336	0.312885	4.78551e-06		0.313129	4.78923e-06
337	0.312643	4.62657e-06		0.312885	4.63016e-06
338	0.3124	4.47292e-06		0.312643	4.47638e-06
339	0.312159	4.32438e-06		0.3124	4.32772e-06
340	0.311918	4.18077e-06		0.312159	4.184e-06
341	0.311678	4.04194e-06		0.311918	4.04506e-06
342	0.311438	3.90773e-06		0.311678	3.91074e-06
343	0.311199	3.77798e-06		0.311438	3.78088e-06
344	0.310961	3.65254e-06		0.311199	3.65534e-06
345	0.310723	3.53127e-06		0.310961	3.53397e-06
346	0.310486	3.41403e-06		0.310723	3.41664e-06
347	0.31025	3.30069e-06		0.310486	3.30321e-06
348	0.310014	3.19112e-06		0.31025	3.19355e-06
349	0.309778	3.08519e-06		0.310014	3.08753e-06
350	0.309544	2.98278e-06		0.309778	2.98504e-06
351	0.30931	2.88377e-06		0.309544	2.88595e-06
352	0.309076	2.78805e-06		0.30931	2.79016e-06
353	0.308843	2.69552e-06		0.309076	2.69755e-06
354	0.308611	2.60605e-06		0.308843	2.60801e-06
355	0.308379	2.51956e-06		0.308611	2.52146e-06
356	0.308148	2.43595e-06		0.308379	2.43778e-06
357	0.307918	2.35511e-06		0.308148	2.35688e-06
358	0.307688	2.27696e-06		0.307918	2.27866e-06
359	0.307459	2.20141e-06		0.307688	2.20305e-06
360	0.30723	2.12836e-06		0.307459	2.12995e-06
361	0.307002	2.05774e-06		0.30723	2.05927e-06
362	0.306774	1.98947e-06		0.307002	1.99095e-06
363	0.306548	1.92346e-06		0.306774	1.92489e-06
364	0.306321	1.85965e-06		0.306548	1.86103e-06
365	0.306095	1.79796e-06		0.306321	1.79929e-06
366	0.30587	1.73832e-06		0.306095	1.7396e-06
367	0.305646	1.68065e-06		0.30587	1.68189e-06
368	0.305422	1.6249e-06		0.305646	1.6261e-06
369	0.305198	1.57101e-06		0.305422	1.57216e-06
370	0.304975	1.5189e-06		0.305198	1.52001e-06
371	0.304753	1.46852e-06		0.304975	1.46959e-06
372	0.304531	1.41982e-06		0.304753	1.42085e-06
373	0.30431	1.37273e-06		0.304531	1.37373e-06
374	0.30409	1.32721e-06		0.30431	1.32817e-06
375	0.30387	1.2832e-06		0.30409	1.28413e-06
376	0.30365	1.24065e-06		0.30387	1.24154e-06
377	0.303431	1.19951e-06		0.30365	1.20037e-06
378	0.303213	1.15973e-06		0.303431	1.16057e-06
379	0.302995	1.12128e-06		0.303213	1.12209e-06
380	0.302778	1.08411e-06		0.302995	1.08488e-06
381	0.302561	1.04816e-06		0.302778	1.04891e-06
382	0.302345	1.01341e-06		0.302561	1.01414e-06
383	0.30213	9.79818e-07		0.302345	9.80517e-07
384	0.301915	9.47337e-07		0.30213	9.48011e-07
385	0.3017	9.15934e-07		0.301915	9.16585e-07
386	0.301486	8.85573e-07		0.3017	8.86201e-07
387	0.301273	8.5622e-07		0.301486	8.56826e-07
388	0.30106	8.2784e-07		0.301273	8.28425e-07
389	0.300848	8.00403e-07		0.30106	8.00967e-07
390	0.300636	7.73875e-07		0.300848	7.7442e-07
391	0.300425	7.48228e-07		0.300636	7.48754e-07
392	0.300214	7.23432e-07		0.300425	7.2394e-07
393	0.300004	6.99459e-07		0.300214	6.99948e-07
394	0.299794	6.7628e-07		0.300004	6.76753e-07
395	0.299585	6.53871e-07		0.299794	6.54327e-07
396	0.299377	6.32205e-07		0.299585	6.32645e-07
397	0.299169	6.11258e-07		0.299377	6.11683e-07
398	0.298961	5.91006e-07		0.299169	5.91416e-07
399	0.298755	5.71425e-07		0.298961	5.71821e-07
400	0.298548	5.52494e-07		0.298755	5.52876e-07
401	0.298342	5.3419e-07		0.298548	5.34559e-07
402	0.298137	5.16494e-07		0.298342	5.1685e-07
403	0.297932	4.99385e-07		0.298137	4.99728e-07
404	0.297728	4.82842e-07		0.297932	4.83174e-07
405	0.297524	4.66849e-07		0.297728	4.67169e-07
406	0.297321	4.51386e-07		0.297524	4.51694e-07
407	0.297118	4.36435e-07		0.297321	4.36733e-07
408	0.296916	4.21981e-07		0.297118	4.22268e-07
409	0.296714	4.08005e-07		0.296916	4.08283e-07
410	0.296513	3.94493e-07		0.296714	3.94761e-07
411	0.296312	3.81429e-07		0.296513	3.81687e-07
412	0.296112	3.68798e-07		0.296312	3.69047e-07
413	0.295912	3.56586e-07		0.296112	3.56826e-07
414	0.295713	3.44778e-07		0.295912	3.4501e-07
415	0.295515	3.33362e-07		0.295713	3.33586e-07
416	0.295317	3.22324e-07		0.295515	3.22541e-07
417	0.295119	3.11653e-07		0.295317	3.11861e-07
418	0.294922	3.01334e-07		0.295119	3.01536e-07
419	0.294725	2.91358e-07		0.294922	2.91553e-07
420	0.294529	2.81713e-07		0.294725	2.819e-07
421	0.294333	2.72387e-07		0.294529	2.72568e-07
422	0.294138	2.6337e-07		0.294333	2.63545e-07
423	0.293944	2.54652e-07		0.294138	2.54821e-07
424	0.293749	2.46223e-07		0.293944	2.46386e-07
425	0.293556	2.38073e-07		0.293749	2.3823e-07
426	0.293363	2.30193e-07		0.293556	2.30345e-07
427	0.29317	2.22575e-07		0.293363	2.22721e-07
428	0.292978	2.15208e-07		0.29317	2.1535e-07
429	0.292786	2.08086e-07		0.292978	2.08222e-07
430	0.292595	2.012e-07		0.292786	2.01331e-07
431	0.292404	1.94542e-07		0.292595	1.94669e-07
432	0.292214	1.88104e-07		0.292404	1.88227e-07
433	0.292024	1.8188e-07		0.292214	1.81998e-07
434	0.291835	1.75862e-07		0.292024	1.75976e-07
435	0.291646	1.70043e-07		0.291835	1.70153e-07
436	0.291458	1.64417e-07		0.291646	1.64523e-07
437	0.29127	1.58977e-07		0.291458	1.5908e-07
438	0.291083	1.53718e-07		0.29127	1.53817e-07
439	0.290896	1.48632e-07		0.291083	1.48728e-07
440	0.290709	1.43715e-07		0.290896	1.43807e-07
441	0.290523	1.38961e-07		0.290709	1.3905e-07
442	0.290338	1.34364e-07		0.290523	1.3445e-07
443	0.290153	1.2992e-07		0.290338	1.30003e-07
444	0.289968	1.25623e-07		0.290153	1.25703e-07
445	0.289784	1.21468e-07		0.289968	1.21545e-07
446	0.289601	1.1745e-07		0.289784	1.17525e-07
447	0.289418	1.13566e-07		0.289601	1.13638e-07
448	0.289235	1.0981e-07		0.289418	1.09879e-07
449	0.289053	1.06178e-07		0.289235	1.06245e-07
450	0.288871	1.02667e-07		0.289053	1.02732e-07
451	0.28869	9.9272e-08		0.288871	9.93343e-08
452	0.288509	9.59893e-08		0.28869	9.60494e-08
453	0.288329	9.28153e-08		0.288509	9.28733e-08
454	0.288149	8.97463e-08		0.288329	8.98024e-08
455	0.287969	8.6779e-08		0.288149	8.6833e-08
456	0.28779	8.39098e-08		0.287969	8.3962e-08
457	0.287612	8.11356e-08		0.28779	8.1186e-08
458	0.287434	7.84532e-08		0.287612	7.85018e-08
459	0.287256	7.58596e-08		0.287434	7.59065e-08
460	0.287079	7.33518e-08		0.287256	7.33971e-08
461	0.286902	7.0927e-08		0.287079	7.09707e-08
462	0.286726	6.85825e-08		0.286902	6.86246e-08
463	0.28655	6.63155e-08		0.286726	6.63562e-08
464	0.286375	6.41235e-08		0.28655	6.41628e-08
465	0.2862	6.20041e-08		0.286375	6.2042e-08
466	0.286025	5.99548e-08		0.2862	5.99914e-08
467	0.285851	5.79733e-08		0.286025	5.80086e-08
468	0.285678	5.60573e-08		0.285851	5.60914e-08
469	0.285504	5.42047e-08		0.285678	5.42376e-08
470	0.285332	5.24134e-08		0.285504	5.24452e-08
471	0.285159	5.06814e-08		0.285332	5.0712e-08
472	0.284988	4.90066e-08		0.285159	4.90362e-08
473	0.284816	4.73873e-08		0.284988	4.74158e-08
474	0.284645	4.58215e-08		0.284816	4.5849e-08
475	0.284475	4.43075e-08		0.284645	4.43341e-08
476	0.284304	4.28436e-08		0.284475	4.28692e-08
477	0.284135	4.14281e-08		0.284304	4.14528e-08
478	0.283965	4.00594e-08		0.284135	4.00833e-08
479	0.283797	3.8736e-08		0.283965	3.8759e-08
480	0.283628	3.74563e-08		0.283797	3.74785e-08
481	0.28346	3.6219e-08		0.283628	3.62404e-08
482	0.283293	3.50225e-08		0.28346	3.50432e-08
483	0.283126	3.38656e-08		0.283293	3.38856e-08
484	0.282959	3.2747e-08		0.283126	3.27663e-08
485	0.282793	3.16654e-08		0.282959	3.1684e-08
486	0.282627	3.06195e-08		0.282793	3.06375e-08
487	0.282461	2.96082e-08		0.282627	2.96256e-08
488	0.282296	2.86304e-08		0.282461	2.86471e-08
489	0.282132	2.76848e-08		0.282296	2.7701e-08
490	0.281968	2.67706e-08		0.282132	2.67861e-08
491	0.281804	2.58865e-08		0.281968	2.59015e-08
492	0.28164	2.50317e-08		0.281804	2.50462e-08
493	0.281477	2.42051e-08		0.28164	2.42191e-08
494	0.281315	2.34058e-08		0.281477	2.34194e-08
495	0.281153	2.2633e-08		0.281315	2.2646e-08
496	0.280991	2.18857e-08		0.281153	2.18983e-08
497	0.28083	2.11631e-08		0.280991	2.11753e-08
498	0.280669	2.04644e-08		0.28083	2.04761e-08
499	0.280508	1.97888e-08		0.280669	1.98001e-08
500	0.280348	1.91355e-08		0.280508	1.91464e-08
501	0.280189	1.85038e-08		0.280348	1.85143e-08
502	0.280029	1.78929e-08		0.280189	1.79031e-08
503	0.279871	1.73023e-08		0.280029	1.73121e-08
504	0.279712	1.67311e-08		0.279871	1.67406e-08
505	0.279554	1.61789e-08		0.279712	1.6188e-08
506	0.279396	1.56449e-08		0.279554	1.56537e-08
507	0.279239	1.51285e-08		0.279396	1.5137e-08
508	0.279082	1.46292e-08		0.279239	1.46374e-08
509	0.278926	1.41464e-08		0.279082	1.41543e-08
510	0.27877	1.36795e-08		0.278926	1.36871e-08
511	0.278614	1.3228e-08		0.27877	1.32354e-08
512	0.278459	1.27915e-08		0.278614	1.27986e-08
513	0.278304	1.23694e-08		0.278459	1.23763e-08
514	0.27815	1.19612e-08		0.278304	1.19679e-08
515	0.277995	1.15665e-08		0.27815	1.15729e-08
516	0.277842	1.11849e-08		0.277995	1.11911e-08
517	0.277688	1.08158e-08		0.277842	1.08218e-08
518	0.277536	1.0459e-08		0.277688	1.04647e-08
519	0.277383	1.01139e-08		0.277536	1.01195e-08
520	0.277231	9.78021e-09		0.277383	9.78558e-09
521	0.277079	9.45755e-09		0.277231	9.46273e-09
522	0.276928	9.14555e-09		0.277079	9.15054e-09
523	0.276777	8.84384e-09		0.276928	8.84867e-09
524	0.276626	8.5521e-09		0.276777	8.55676e-09
525	0.276476	8.26999e-09		0.276626	8.27449e-09
526	0.276326	7.9972e-09		0.276476	8.00154e-09
527	0.276176	7.73342e-09		0.276326	7.7376e-09
528	0.276027	7.47834e-09		0.276176	7.48238e-09
529	0.275879	7.23168e-09		0.276027	7.23558e-09
530	0.27573	6.99317e-09		0.275879	6.99693e-09
531	0.275582	6.76253e-09		0.27573	6.76616e-09
532	0.275435	6.5395e-09		0.275582	6.54301e-09
533	0.275288	6.32384e-09		0.275435	6.32722e-09
534	0.275141	6.1153e-09		0.275288	6.11856e-09
535	0.274994	5.91364e-09		0.275141	5.91678e-09
536	0.274848	5.71863e-09		0.274994	5.72167e-09
537	0.274702	5.53006e-09		0.274848	5.533e-09
538	0.274557	5.34772e-09		0.274702	5.35055e-09
539	0.274412	5.17139e-09		0.274557	5.17412e-09
540	0.274267	5.00088e-09		0.274412	5.00352e-09
541	0.274123	4.836e-09		0.274267	4.83855e-09
542	0.273979	4.67656e-09		0.274123	4.67902e-09
543	0.273836	4.52238e-09		0.273979	4.52475e-09
544	0.273693	4.37329e-09		0.273836	4.37558e-09
545	0.27355	4.22912e-09		0.273693	4.23133e-09
546	0.273407	4.08971e-09		0.27355	4.09184e-09
547	0.273265	3.95489e-09		0.273407	3.95695e-09
548	0.273124	3.82453e-09		0.273265	3.82651e-09
549	0.272982	3.69846e-09		0.273124	3.70038e-09
550	0.272841	3.57656e-09		0.272982	3.5784e-09
551	0.272701	3.45867e-09		0.272841	3.46046e-09
552	0.27256	3.34468e-09		0.272701	3.3464e-09
553	0.27242	3.23444e-09		0.27256	3.2361e-09
554	0.272281	3.12784e-09		0.27242	3.12945e-09
555	0.272141	3.02476e-09		0.272281	3.02631e-09
556	0.272003	2.92508e-09		0.272141	2.92657e-09
557	0.271864	2.82869e-09		0.272003	2.83013e-09
558	0.271726	2.73547e-09		0.271864	2.73686e-09
559	0.271588	2.64533e-09		0.271726	2.64668e-09
560	0.271451	2.55817e-09		0.271588	2.55946e-09
561	0.271313	2.47387e-09		0.271451	2.47512e-09
562	0.271177	2.39236e-09		0.271313	2.39357e-09
563	0.27104	2.31354e-09		0.271177	2.3147e-09
564	0.270904	2.23731e-09		0.27104	2.23844e-09
565	0.270768	2.1636e-09		0.270904	2.16469e-09
566	0.270633	2.09232e-09		0.270768	2.09337e-09
567	0.270498	2.02339e-09		0.270633	2.0244e-09
568	0.270363	1.95673e-09		0.270498	1.95771e-09
569	0.270229	1.89228e-09		0.270363	1.89322e-09
570	0.270095	1.82994e-09		0.270229	1.83085e-09
571	0.269961	1.76966e-09		0.270095	1.77054e-09
572	0.269828	1.71137e-09		0.269961	1.71222e-09
573	0.269695	1.655e-09		0.269828	1.65582e-09
574	0.269562	1.60049e-09		0.269695	1.60128e-09
575	0.26943	1.54777e-09		0.269562	1.54854e-09
576	0.269298	1.4968e-09		0.26943	1.49753e-09
577	0.269166	1.4475e-09		0.269298	1.44821e-09
578	0.269035	1.39983e-09		0.269166	1.40051e-09
579	0.268904	1.35373e-09		0.269035	1.35439e-09
580	0.268773	1.30915e-09		0.268904	1.30979e-09
581	0.268643	1.26604e-09		0.268773	1.26665e-09
582	0.268513	1.22435e-09		0.268643	1.22494e-09
583	0.268383	1.18403e-09		0.268513	1.1846e-09
584	0.268254	1.14504e-09		0.268383	1.1456e-09
585	0.268125	1.10734e-09		0.268254	1.10787e-09
586	0.267996	1.07088e-09		0.268125	1.0714e-09
587	0.267868	1.03562e-09		0.267996	1.03612e-09
588	0.267739	1.00153e-09		0.267868	1.00201e-09
589	0.267612	9.68553e-10		0.267739	9.69015e-10
590	0.267484	9.36666e-10		0.267612	9.37112e-10
591	0.267357	9.0583e-10		0.267484	9.06261e-10
592	0.267231	8.7601e-10		0.267357	8.76426e-10
593	0.267104	8.47172e-10		0.267231	8.47573e-10
594	0.266978	8.19285e-10		0.267104	8.19672e-10
595	0.266852	7.92316e-10		0.266978	7.9269e-10
596	0.266727	7.66236e-10		0.266852	7.66597e-10
597	0.266602	7.41015e-10		0.266727	7.41363e-10
598	0.266477	7.16625e-10		0.266602	7.16961e-10
599	0.266352	6.93038e-10		0.266477	6.93362e-10
600	0.266228	6.70228e-10		0.266352	6.70541e-10
601	0.266104	6.4817e-10		0.266228	6.48472e-10
602	0.26598	6.26838e-10		0.266104	6.2713e-10
603	0.265857	6.06209e-10		0.26598	6.0649e-10
604	0.265734	5.86259e-10		0.265857	5.86531e-10
605	0.265612	5.66967e-10		0.265734	5.67229e-10
606	0.265489	5.4831e-10		0.265612	5.48562e-10
607	0.265367	5.30267e-10		0.265489	5.30511e-10
608	0.265245	5.12818e-10		0.265367	5.13054e-10
609	0.265124	4.95944e-10		0.265245	4.96171e-10
610	0.265003	4.79626e-10		0.265124	4.79845e-10
611	0.264882	4.63845e-10		0.265003	4.64057e-10
612	0.264762	4.48584e-10		0.264882	4.48788e-10
613	0.264641	4.33825e-10		0.264762	4.34022e-10
614	0.264522	4.19553e-10		0.264641	4.19743e-10
615	0.264402	4.0575e-10		0.264522	4.05933e-10
616	0.264283	3.92401e-10		0.264402	3.92579e-10
617	0.264164	3.79493e-10		0.264283	3.79664e-10
618	0.264045	3.67009e-10		0.264164	3.67174e-10
619	0.263927	3.54936e-10		0.264045	3.55095e-10
620	0.263809	3.43261e-10		0.263927	3.43414e-10
621	0.263691	3.3197e-10		0.263809	3.32118e-10
622	0.263573	3.2105e-10		0.263691	3.21193e-10
623	0.263456	3.1049e-10		0.263573	3.10629e-10
624	0.263339	3.00278e-10		0.263456	3.00411e-10
625	0.263223	2.90402e-10		0.263339	2.90531e-10
626	0.263106	2.80851e-10		0.263223	2.80975e-10
627	0.26299	2.71614e-10		0.263106	2.71734e-10
628	0.262875	2.62682e-10		0.26299	2.62797e-10
629	0.262759	2.54043e-10		0.262875	2.54155e-10
630	0.262644	2.45689e-10		0.262759	2.45797e-10
631	0.262529	2.3761e-10		0.262644	2.37714e-10
632	0.262415	2.29796e-10		0.262529	2.29896e-10
633	0.262301	2.2224e-10		0.262415	2.22337e-10
634	0.262187	2.14932e-10		0.262301	2.15026e-10
635	0.262073	2.07865e-10		0.262187	2.07955e-10
636	0.26196	2.0103e-10		0.262073	2.01117e-10
637	0.261847	1.94421e-10		0.26196	1.94505e-10
638	0.261734	1.88029e-10		0.261847	1.8811e-10
639	0.261621	1.81847e-10		0.261734	1.81925e-10
640	0.261509	1.75868e-10		0.261621	1.75944e-10
641	0.261397	1.70086e-10		0.261509	1.70159e-10
642	0.261285	1.64495e-10		0.261397	1.64565e-10
643	0.261174	1.59087e-10		0.261285	1.59155e-10
644	0.261063	1.53858e-10		0.261174	1.53923e-10
645	0.260952	1.488e-10		0.261063	1.48863e-10
646	0.260842	1.43909e-10		0.260952	1.4397e-10
647	0.260731	1.39178e-10		0.260842	1.39237e-10
648	0.260621	1.34604e-10		0.260731	1.3466e-10
649	0.260512	1.30179e-10		0.260621	1.30234e-10
650	0.260402	1.25901e-10		0.260512	1.25954e-10
651	0.260293	1.21763e-10		0.260402	1.21814e-10
652	0.260184	1.17761e-10		0.260293	1.1781e-10
653	0.260076	1.13891e-10		0.260184	1.13938e-10
654	0.259967	1.10148e-10		0.260076	1.10194e-10
655	0.259859	1.06528e-10		0.259967	1.06572e-10
656	0.259751	1.03027e-10		0.259859	1.0307e-10
657	0.259644	9.96413e-11		0.259751	9.96826e-11
658	0.259537	9.6367e-11		0.259644	9.64068e-11
659	0.25943	9.32004e-11		0.259537	9.32388e-11
660	0.259323	9.01379e-11		0.25943	9.0175e-11
661	0.259217	8.71761e-11		0.259323	8.72119e-11
662	0.25911	8.43117e-11		0.259217	8.43462e-11
663	0.259005	8.15415e-11		0.25911	8.15748e-11
664	0.258899	7.88623e-11		0.259005	7.88945e-11
665	0.258794	7.62713e-11		0.258899	7.63024e-11
666	0.258689	7.37655e-11		0.258794	7.37954e-11
667	0.258584	7.1342e-11		0.258689	7.13709e-11
668	0.258479	6.89983e-11		0.258584	6.90262e-11
669	0.258375	6.67315e-11		0.258479	6.67585e-11
670	0.258271	6.45393e-11		0.258375	6.45653e-11
671	0.258167	6.24192e-11		0.258271	6.24443e-11
672	0.258064	6.03688e-11		0.258167	6.0393e-11
673	0.25796	5.83858e-11		0.258064	5.84091e-11
674	0.257858	5.64679e-11		0.25796	5.64905e-11
675	0.257755	5.46131e-11		0.257858	5.46349e-11
676	0.257652	5.28193e-11		0.257755	5.28403e-11
677	0.25755	5.10845e-11		0.257652	5.11047e-11
678	0.257448	4.94066e-11		0.25755	4.94262e-11
679	0.257347	4.77839e-11		0.257448	4.78028e-11
680	0.257245	4.62146e-11		0.257347	4.62328e-11
681	0.257144	4.46968e-11		0.257245	4.47144e-11
682	0.257043	4.32289e-11		0.257144	4.32459e-11
683	0.256942	4.18093e-11		0.257043	4.18256e-11
684	0.256842	4.04363e-11		0.256942	4.04521e-11
685	0.256742	3.91084e-11		0.256842	3.91237e-11
686	0.256642	3.78242e-11		0.256742	3.78389e-11
687	0.256542	3.65821e-11		0.256642	3.65963e-11
688	0.256443	3.53809e-11		0.256542	3.53946e-11
689	0.256344	3.42192e-11		0.256443	3.42324e-11
690	0.256245	3.30956e-11		0.256344	3.31084e-11
691	0.256146	3.20089e-11		0.256245	3.20213e-11
692	0.256048	3.0958e-11		0.256146	3.09699e-11
693	0.25595	2.99416e-11		0.256048	2.99531e-11
694	0.255852	2.89585e-11		0.25595	2.89696e-11
695	0.255754	2.80078e-11		0.255852	2.80185e-11
696	0.255657	2.70883e-11		0.255754	2.70986e-11
697	0.25556	2.6199e-11		0.255657	2.6209e-11
698	0.255463	2.5339e-11		0.25556	2.53486e-11
699	0.255366	2.45072e-11		0.255463	2.45164e-11
700	0.25527	2.37027e-11		0.255366	2.37116e-11
701	0.255174	2.29246e-11		0.25527	2.29333e-11
702	0.255078	2.21721e-11		0.255174	2.21804e-11
703	0.254982	2.14443e-11		0.255078	2.14524e-11
704	0.254887	2.07404e-11		0.254982	2.07482e-11
705	0.254792	2.00597e-11		0.254887	2.00672e-11
706	0.254697	1.94013e-11		0.254792	1.94085e-11
707	0.254602	1.87645e-11		0.254697	1.87715e-11
708	0.254508	1.81487e-11		0.254602	1.81554e-11
709	0.254413	1.7553e-11		0.254508	1.75595e-11
710	0.254319	1.6977e-11		0.254413	1.69832e-11
711	0.254226	1.64198e-11		0.254319	1.64259e-11
712	0.254132	1.5881e-11		0.254226	1.58868e-11
713	0.254039	1.53598e-11		0.254132	1.53654e-11
714	0.253946	1.48558e-11		0.254039	1.48612e-11
715	0.253853	1.43683e-11		0.253946	1.43735e-11
716	0.253761	1.38968e-11		0.253853	1.39018e-11
717	0.253668	1.34408e-11		0.253761	1.34457e-11
718	0.253576	1.29997e-11		0.253668	1.30045e-11
719	0.253484	1.25732e-11		0.253576	1.25778e-11
720	0.253393	1.21607e-11		0.253484	1.21651e-11
721	0.253301	1.17617e-11		0.253393	1.17659e-11
722	0.25321	1.13758e-11		0.253301	1.13799e-11
723	0.253119	1.10025e-11		0.25321	1.10065e-11
724	0.253028	1.06416e-11		0.253119	1.06454e-11
725	0.252938	1.02924e-11		0.253028	1.02961e-11
726	0.252848	9.95478e-12		0.252938	9.95834e-12
727	0.252758	9.62821e-12		0.252848	9.63164e-12
728	0.252668	9.31235e-12		0.252758	9.31566e-12
729	0.252578	9.00687e-12		0.252668	9.01006e-12
730	0.252489	8.71141e-12		0.252578	8.71449e-12
731	0.2524	8.42565e-12		0.252489	8.42862e-12
732	0.252311	8.14927e-12		0.2524	8.15214e-12
733	0.252222	7.88196e-12		0.252311	7.88473e-12
734	0.252134	7.62343e-12		0.252222	7.6261e-12
735	0.252046	7.37338e-12		0.252134	7.37596e-12
736	0.251958	7.13154e-12		0.252046	7.13403e-12
737	0.25187	6.89764e-12		0.251958	6.90004e-12
738	0.251782	6.67141e-12		0.25187	6.67373e-12
739	0.251695	6.45261e-12		0.251782	6.45485e-12
740	0.251608	6.24099e-12		0.251695	6.24315e-12
741	0.251521	6.03631e-12		0.251608	6.03839e-12
742	0.251434	5.83835e-12		0.251521	5.84036e-12
743	0.251348	5.64689e-12		0.251434	5.64883e-12
744	0.251262	5.46171e-12		0.251348	5.46358e-12
745	0.251176	5.2826e-12		0.251262	5.28441e-12
746	0.25109	5.10938e-12		0.251176	5.11112e-12
747	0.251004	4.94183e-12		0.25109	4.94352e-12
748	0.250919	4.77979e-12		0.251004	4.78141e-12
749	0.250834	4.62306e-12		0.250919	4.62463e-12
750	0.250749	4.47148e-12		0.250834	4.47299e-12
751	0.250664	4.32486e-12		0.250749	4.32633e-12
752	0.25058	4.18306e-12		0.250664	4.18447e-12
753	0.250496	4.04591e-12		0.25058	4.04727e-12
754	0.250412	3.91326e-12		0.250496	3.91458e-12
755	0.250328	3.78496e-12		0.250412	3.78623e-12
756	0.250244	3.66088e-12		0.250328	3.6621e-12
757	0.250161	3.54086e-12		0.250244	3.54204e-12
758	0.250077	3.42478e-12		0.250161	3.42592e-12
759	0.249994	3.3125e-12		0.250077	3.3136e-12
760	0.249912	3.20391e-12		0.249994	3.20498e-12
761	0.249829	3.09889e-12		0.249912	3.09991e-12
762	0.249747	2.9973e-12		0.249829	2.99829e-12
763	0.249664	2.89905e-12		0.249747	2.90001e-12
764	0.249583	2.80402e-12		0.249664	2.80494e-12
765	0.249501	2.71211e-12		0.249583	2.713e-12
766	0.249419	2.62322e-12		0.249501	2.62407e-12
767	0.249338	2.53723e-12		0.249419	2.53806e-12
768	0.249257	2.45407e-12		0.249338	2.45487e-12
769	0.249176	2.37364e-12		0.249257	2.37441e-12
770	0.249095	2.29584e-12		0.249176	2.29659e-12
771	0.249015	2.2206e-12		0.249095	2.22132e-12
772	0.248934	2.14782e-12		0.249015	2.14852e-12
773	0.248854	2.07743e-12		0.248934	2.0781e-12
774	0.248774	2.00935e-12		0.248854	2.01e-12
775	0.248695	1.9435e-12		0.248774	1.94412e-12
776	0.248615	1.87981e-12		0.248695	1.88041e-12
777	0.248536	1.81821e-12		0.248615	1.81879e-12
778	0.248457	1.75863e-12		0.248536	1.75919e-12
779	0.248378	1.701e-12		0.248457	1.70154e-12
780	0.248299	1.64526e-12		0.248378	1.64578e-12
781	0.248221	1.59135e-12		0.248299	1.59185e-12
782	0.248142	1.53921e-12		0.248221	1.53969e-12
783	0.248064	1.48877e-12		0.248142	1.48924e-12
784	0.247986	1.43999e-12		0.248064	1.44045e-12
785	0.247909	1.39281e-12		0.247986	1.39325e-12
786	0.247831	1.34718e-12		0.247909	1.3476e-12
787	0.247754	1.30304e-12		0.247831	1.30345e-12
788	0.247677	1.26035e-12		0.247754	1.26074e-12
789	0.2476	1.21906e-12		0.247677	1.21944e-12
790	0.247523	1.17912e-12		0.2476	1.17949e-12
791	0.247446	1.14049e-12		0.247523	1.14085e-12
792	0.24737	1.10313e-12		0.247446	1.10347e-12
793	0.247294	1.06699e-12		0.24737	1.06732e-12
794	0.247218	1.03204e-12		0.247294	1.03236e-12
795	0.247142	9.98232e-13		0.247218	9.98538e-13
796	0.247067	9.65532e-13		0.247142	9.65828e-13
797	0.246991	9.33905e-13		0.247067	9.3419e-13
798	0.246916	9.03314e-13		0.246991	9.03589e-13
799	0.246841	8.73725e-13		0.246916	8.73991e-13
800	0.246766	8.45107e-13		0.246841	8.45363e-13
801	0.246692	8.17426e-13		0.246766	8.17673e-13
802	0.246617	7.90653e-13		0.246692	7.90891e-13
803	0.246543	7.64757e-13		0.246617	7.64987e-13
804	0.246469	7.39709e-13		0.246543	7.39932e-13
805	0.246395	7.15483e-13		0.246469	7.15697e-13
806	0.246321	6.9205e-13		0.246395	6.92257e-13
807	0.246248	6.69386e-13		0.246321	6.69585e-13
808	0.246175	6.47463e-13		0.246248	6.47656e-13
809	0.246102	6.2626e-13		0.246175	6.26446e-13
810	0.246029	6.05751e-13		0.246102	6.05931e-13
811	0.245956	5.85914e-13		0.246029	5.86087e-13
812	0.245883	5.66727e-13		0.245956	5.66894e-13
813	0.245811	5.48169e-13		0.245883	5.4833e-13
814	0.245739	5.30219e-13		0.245811	5.30375e-13
815	0.245667	5.12857e-13		0.245739	5.13007e-13
816	0.245595	4.96064e-13		0.245667	4.96209e-13
817	0.245523	4.79821e-13		0.245595	4.79961e-13
818	0.245452	4.6411e-13		0.245523	4.64245e-13
819	0.24538	4.48914e-13		0.245452	4.49044e-13
820	0.245309	4.34216e-13		0.24538	4.34341e-13
821	0.245238	4.19999e-13		0.245309	4.2012e-13
822	0.245168	4.06248e-13		0.245238	4.06365e-13
823	0.245097	3.92947e-13		0.245168	3.9306e-13
824	0.245027	3.80083e-13		0.245097	3.80192e-13
825	0.244957	3.67639e-13		0.245027	3.67744e-13
826	0.244886	3.55603e-13		0.244957	3.55705e-13
827	0.244817	3.43962e-13		0.244886	3.4406e-13
828	0.244747	3.32702e-13		0.244817	3.32796e-13
829	0.244677	3.2181e-13		0.244747	3.21902e-13
830	0.244608	3.11276e-13		0.244677	3.11364e-13
831	0.244539	3.01086e-13		0.244608	3.01171e-13
832	0.24447	2.9123e-13		0.244539	2.91312e-13
833	0.244401	2.81697e-13		0.24447	2.81776e-13
834	0.244333	2.72476e-13		0.244401	2.72553e-13
835	0.244264	2.63557e-13		0.244333	2.63631e-13
836	0.244196	2.54931e-13		0.244264	2.55002e-13
837	0.244128	2.46586e-13		0.244196	2.46655e-13
838	0.24406	2.38515e-13		0.244128	2.38582e-13
839	0.243992	2.30709e-13		0.24406	2.30773e-13
840	0.243924	2.23158e-13		0.243992	2.2322e-13
841	0.243857	2.15854e-13		0.243924	2.15914e-13
842	0.24379	2.0879e-13		0.243857	2.08847e-13
843	0.243723	2.01956e-13		0.24379	2.02012e-13
844	0.243656	1.95347e-13		0.243723	1.95401e-13
845	0.243589	1.88954e-13		0.243656	1.89006e-13
846	0.243522	1.8277e-13		0.243589	1.8282e-13
847	0.243456	1.76789e-13		0.243522	1.76837e-13
848	0.24339	1.71004e-13		0.243456	1.7105e-13
849	0.243324	1.65408e-13		0.24339	1.65453e-13
850	0.243258	1.59995e-13		0.243324	1.60038e-13
851	0.243192	1.5476e-13		0.243258	1.54801e-13
852	0.243127	1.49695e-13		0.243192	1.49736e-13
853	0.243061	1.44797e-13		0.243127	1.44836e-13
854	0.242996	1.40059e-13		0.243061	1.40097e-13
855	0.242931	1.35476e-13		0.242996	1.35513e-13
856	0.242866	1.31044e-13		0.242931	1.31079e-13
857	0.242801	1.26756e-13		0.242866	1.2679e-13
858	0.242737	1.22609e-13		0.242801	1.22641e-13
859	0.242672	1.18597e-13		0.242737	1.18629e-13
860	0.242608	1.14717e-13		0.242672	1.14747e-13
861	0.242544	1.10964e-13		0.242608	1.10993e-13
862	0.24248	1.07333e-13		0.242544	1.07362e-13
863	0.242416	1.03822e-13		0.24248	1.03849e-13
864	0.242353	1.00425e-13		0.242416	1.00452e-13
865	0.242289	9.714e-14		0.242353	9.71654e-14
866	0.242226	9.39621e-14		0.242289	9.39867e-14
867	0.242163	9.08883e-14		0.242226	9.0912e-14
868	0.2421	8.79151e-14		0.242163	8.79379e-14
869	0.242037	8.50391e-14		0.2421	8.50612e-14
870	0.241974	8.22574e-14		0.242037	8.22786e-14
871	0.241912	7.95666e-14		0.241974	7.95872e-14
872	0.24185	7.69639e-14		0.241912	7.69838e-14
873	0.241787	7.44464e-14		0.24185	7.44656e-14
874	0.241725	7.20113e-14		0.241787	7.20298e-14
875	0.241664	6.96559e-14		0.241725	6.96737e-14
876	0.241602	6.73776e-14		0.241664	6.73948e-14
877	0.24154	6.51738e-14		0.241602	6.51904e-14
878	0.241479	6.30421e-14		0.24154	6.30582e-14
879	0.241418	6.09802e-14		0.241479	6.09957e-14
880	0.241357	5.89858e-14		0.241418	5.90007e-14
881	0.241296	5.70566e-14		0.241357	5.7071e-14
882	0.241235	5.51906e-14		0.241296	5.52045e-14
883	0.241174	5.33856e-14		0.241235	5.3399e-14
884	0.241114	5.16397e-14		0.241174	5.16526e-14
885	0.241054	4.99509e-14		0.241114	4.99634e-14
886	0.240993	4.83173e-14		0.241054	4.83294e-14
887	0.240933	4.67373e-14		0.240993	4.67489e-14
888	0.240874	4.52089e-14		0.240933	4.52201e-14
889	0.240814	4.37305e-14		0.240874	4.37413e-14
890	0.240754	4.23005e-14		0.240814	4.23109e-14
891	0.240695	4.09172e-14		0.240754	4.09273e-14
892	0.240636	3.95793e-14		0.240695	3.9589e-14
893	0.240577	3.82851e-14		0.240636	3.82945e-14
894	0.240518	3.70332e-14		0.240577	3.70423e-14
895	0.240459	3.58223e-14		0.240518	3.5831e-14
896	0.2404	3.4651e-14		0.240459	3.46594e-14
897	0.240342	3.3518e-14		0.2404	3.35262e-14
898	0.240283	3.24221e-14		0.240342	3.243e-14
899	0.240225	3.1362e-14		0.240283	3.13696e-14
900	0.240167	3.03366e-14		0.240225	3.0344e-14
901	0.240109	2.93448e-14		0.240167	2.93519e-14
902	0.240051	2.83854e-14		0.240109	2.83922e-14
903	0.239994	2.74574e-14		0.240051	2.7464e-14
904	0.239936	2.65597e-14		0.239994	2.65661e-14
905	0.239879	2.56914e-14		0.239936	2.56975e-14
906	0.239822	2.48515e-14		0.239879	2.48574e-14
907	0.239765	2.40391e-14		0.239822	2.40448e-14
908	0.239708	2.32532e-14		0.239765	2.32587e-14
909	0.239651	2.2493e-14		0.239708	2.24984e-14
910	0.239595	2.17577e-14		0.239651	2.17629e-14
911	0.239538	2.10465e-14		0.239595	2.10514e-14
912	0.239482	2.03585e-14		0.239538	2.03633e-14
913	0.239426	1.9693e-14		0.239482	1.96976e-14
914	0.23937	1.90493e-14		0.239426	1.90538e-14
915	0.239314	1.84266e-14		0.23937	1.84309e-14
916	0.239258	1.78243e-14		0.239314	1.78285e-14
917	0.239202	1.72417e-14		0.239258	1.72457e-14
918	0.239147	1.66781e-14		0.239202	1.6682e-14
919	0.239092	1.6133e-14		0.239147	1.61367e-14
920	0.239036	1.56057e-14		0.239092	1.56093e-14
921	0.238981	1.50957e-14		0.239036	1.50991e-14
922	0.238926	1.46023e-14		0.238981	1.46056e-14
923	0.238872	1.4125e-14		0.238926	1.41283e-14
924	0.238817	1.36634e-14		0.238872	1.36665e-14
925	0.238763	1.32168e-14		0.238817	1.32198e-14
926	0.238708	1.27849e-14		0.238763	1.27878e-14
927	0.238654	1.23671e-14		0.238708	1.23699e-14
928	0.2386	1.19629e-14		0.238654	1.19656e-14
929	0.238546	1.15719e-14		0.2386	1.15746e-14
930	0.238492	1.11938e-14		0.238546	1.11963e-14
931	0.238439	1.0828e-14		0.238492	1.08304e-14
932	0.238385	1.04741e-14		0.238439	1.04765e-14
933	0.238332	1.01319e-14		0.238385	1.01341e-14
934	0.238278	9.80077e-15		0.238332	9.80296e-15
935	0.238225	9.48051e-15		0.238278	9.48262e-15
936	0.238172	9.17072e-15		0.238225	9.17276e-15
937	0.238119	8.87105e-15		0.238172	8.87302e-15
938	0.238067	8.58118e-15		0.238119	8.58308e-15
939	0.238014	8.30079e-15		0.238067	8.30263e-15
940	0.237962	8.02957e-15		0.238014	8.03134e-15
941	0.237909	7.76721e-15		0.237962	7.76892e-15
942	0.237857	7.51342e-15		0.237909	7.51507e-15
943	0.237805	7.26794e-15		0.237857	7.26953e-15
944	0.237753	7.03047e-15		0.237805	7.03201e-15
945	0.237701	6.80077e-15		0.237753	6.80225e-15
946	0.23765	6.57858e-15		0.237701	6.58001e-15
947	0.237598	6.36365e-15		0.23765	6.36503e-15
948	0.237547	6.15574e-15		0.237598	6.15708e-15
949	0.237495	5.95463e-15		0.237547	5.95592e-15
950	0.237444	5.7601e-15		0.237495	5.76134e-15
951	0.237393	5.57192e-15		0.237444	5.57312e-15
952	0.237342	5.38989e-15		0.237393	5.39105e-15
953	0.237292	5.21381e-15		0.237342	5.21493e-15
954	0.237241	5.04349e-15		0.237292	5.04456e-15
955	0.237191	4.87873e-15		0.237241	4.87977e-15
956	0.23714	4.71936e-15		0.237191	4.72036e-15
957	0.23709	4.56519e-15		0.23714	4.56616e-15
958	0.23704	4.41607e-15		0.23709	4.417e-15
959	0.23699	4.27181e-15		0.23704	4.27271e-15
960	0.23694	4.13228e-15		0.23699	4.13314e-15
961	0.23689	3.9973e-15		0.23694	3.99814e-15
962	0.236841	3.86673e-15		0.23689	3.86754e-15
963	0.236791	3.74043e-15		0.236841	3.74121e-15
964	0.236742	3.61825e-15		0.236791	3.61901e-15
965	0.236693	3.50007e-15		0.236742	3.5008e-15
966	0.236643	3.38575e-15		0.236693	3.38645e-15
967	0.236595	3.27517e-15		0.236643	3.27585e-15
968	0.236546	3.1682e-15		0.236595	3.16885e-15
969	0.236497	3.06472e-15		0.236546	3.06535e-15
970	0.236448	2.96463e-15		0.236497	2.96523e-15
971	0.2364	2.8678e-15		0.236448	2.86839e-15
972	0.236351	2.77414e-15		0.2364	2.77471e-15
973	0.236303	2.68354e-15		0.236351	2.68409e-15
974	0.236255	2.5959e-15		0.236303	2.59643e-15
975	0.236207	2.51112e-15		0.236255	2.51163e-15
976	0.236159	2.42912e-15		0.236207	2.42961e-15
977	0.236111	2.34979e-15		0.236159	2.35026e-15
978	0.236064	2.27305e-15		0.236111	2.27351e-15
979	0.236016	2.19882e-15		0.236064	2.19927e-15
980	0.235969	2.12702e-15		0.236016	2.12745e-15
981	0.235922	2.05756e-15		0.235969	2.05797e-15
982	0.235874	1.99037e-15		0.235922	1.99077e-15
983	0.235827	1.92538e-15		0.235874	1.92576e-15
984	0.235781	1.86251e-15		0.235827	1.86288e-15
985	0.235734	1.80169e-15		0.235781	1.80205e-15
986	0.235687	1.74286e-15		0.235734	1.7432e-15
987	0.23564	1.68595e-15		0.235687	1.68628e-15
988	0.235594	1.6309e-15		0.23564	1.63122e-15
989	0.235548	1.57765e-15		0.235594	1.57796e-15
990	0.235502	1.52614e-15		0.235548	1.52643e-15
991	0.235455	1.47631e-15		0.235502	1.47659e-15
992	0.235409	1.4281e-15		0.235455	1.42838e-15
993	0.235364	1.38148e-15		0.235409	1.38175e-15
994	0.235318	1.33637e-15		0.235364	1.33663e-15
995	0.235272	1.29274e-15		0.235318	1.29299e-15
996	0.235227	1.25053e-15		0.235272	1.25078e-15
997	0.235181	1.20971e-15		0.235227	1.20994e-15
998	0.235136	1.17021e-15		0.235181	1.17044e-15
999	0.235091	1.13201e-15		0.235136	1.13223e-15
1000	0.235046	1.09505e-15		0.235091	1.09526e-15
1001	0.235001	1.0593e-15		0.235046	1.0595e-15
1002	0.234956	1.02472e-15		0.235001	1.02492e-15
1003	0.234911	9.91268e-16		0.234956	9.91456e-16
1004	0.234867	9.58908e-16		0.234911	9.5909e-16
